# Supplementary material
Source: HighWire-hosted journal article supplement (http://qualitysafety.bmj.com/highwire/filestream/147625/field_highwire_adjunct_files/0/bmjqs-2014-003467supp.pdf)

**Figure A1** Proportion of emergency admissions by diagnosis-specific risk, by day of the week and per country.

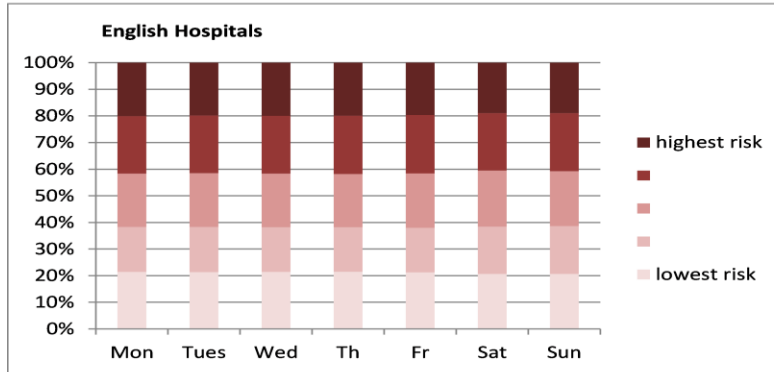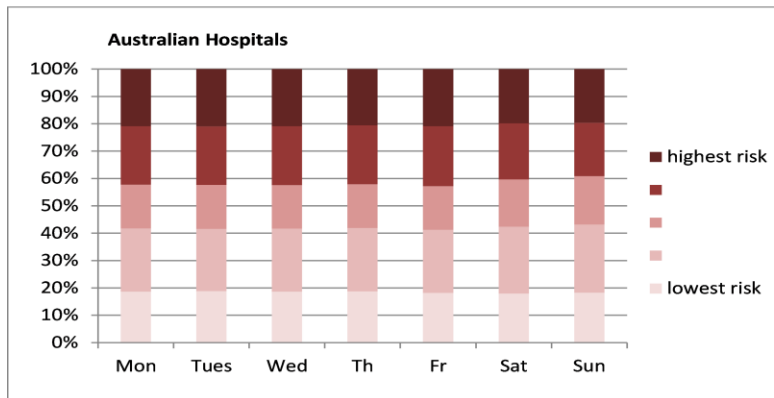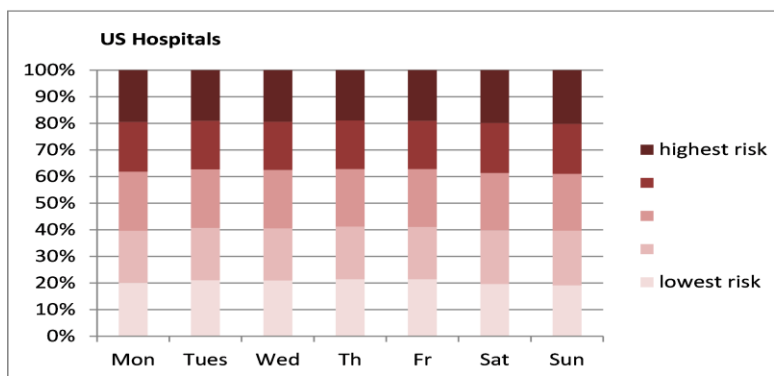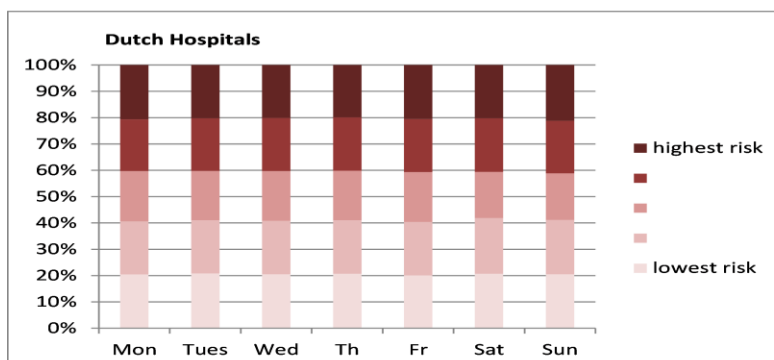

**Figure A2** Proportion of elective admissions by procedure-specific risk, by day of the week and per country.

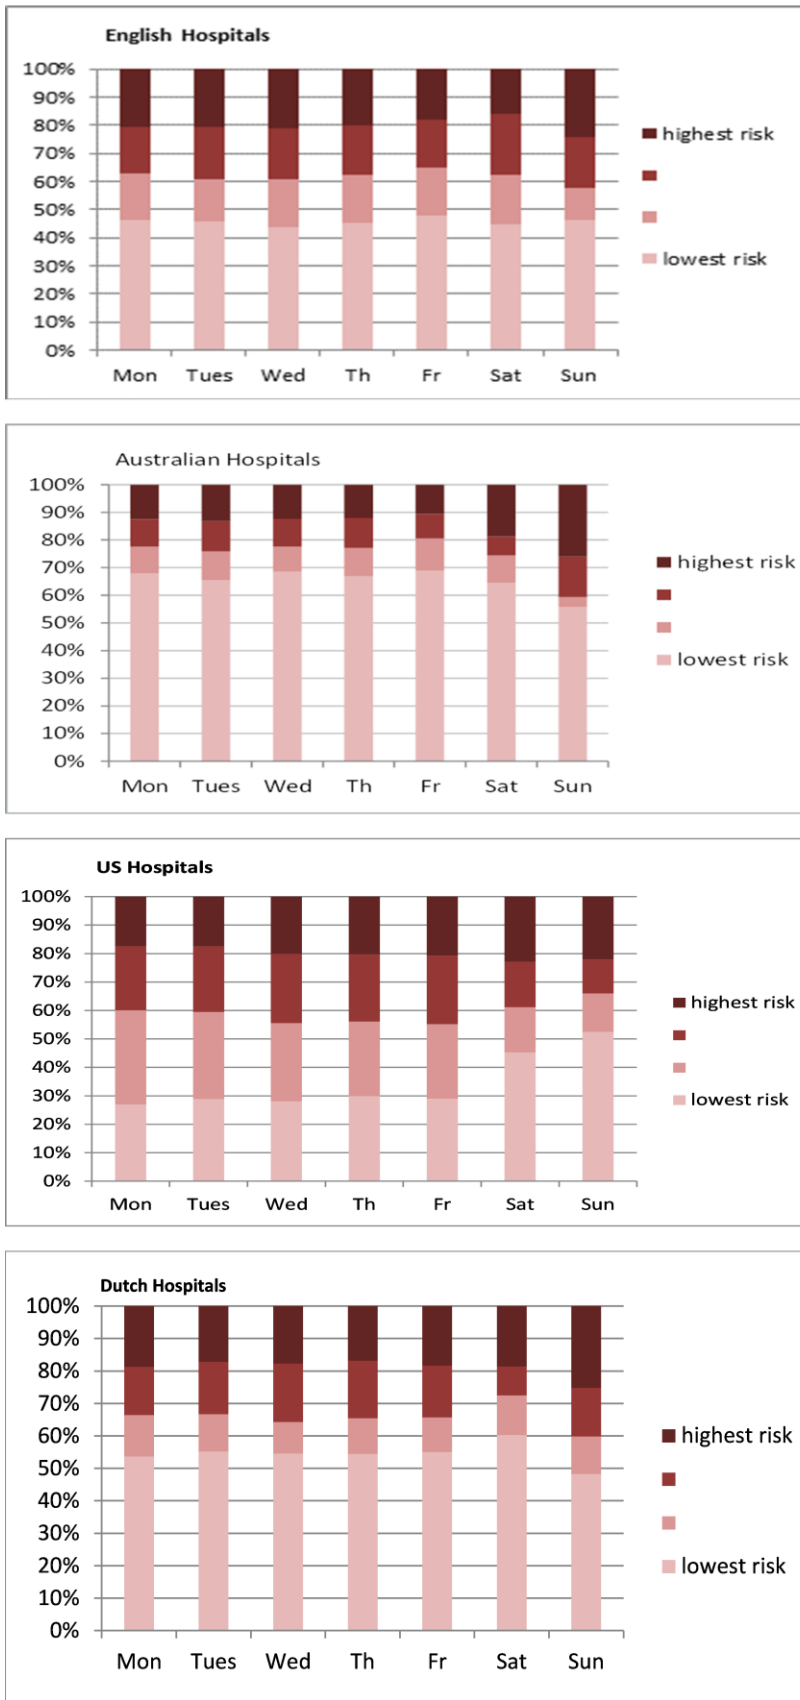

Supplement: bmjqs-2014-003467supp.pdf [file bmjqs-2014-003467supp.pdf]
